# Supplementary material for: The influence of glatiramer acetate on Th17-immune response in multiple sclerosis
Source: PubMed Central journal article supplement (PMC7599084; doi:10.1371/journal.pone.0240305), 2020-10-30
Supplement: pone.0240305.s002.pdf [file pone.0240305.s002.pdf]

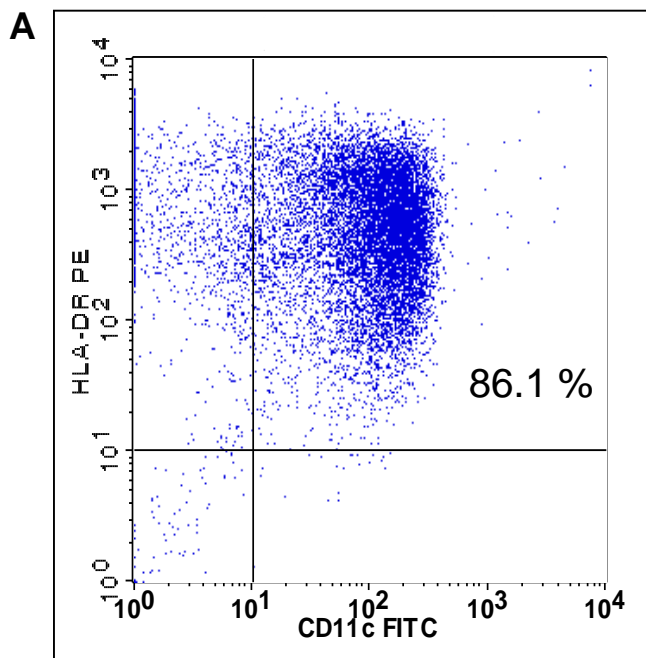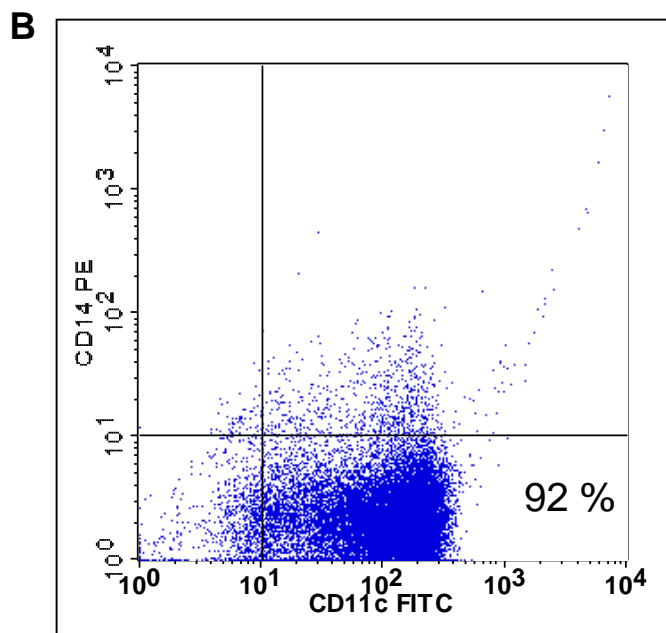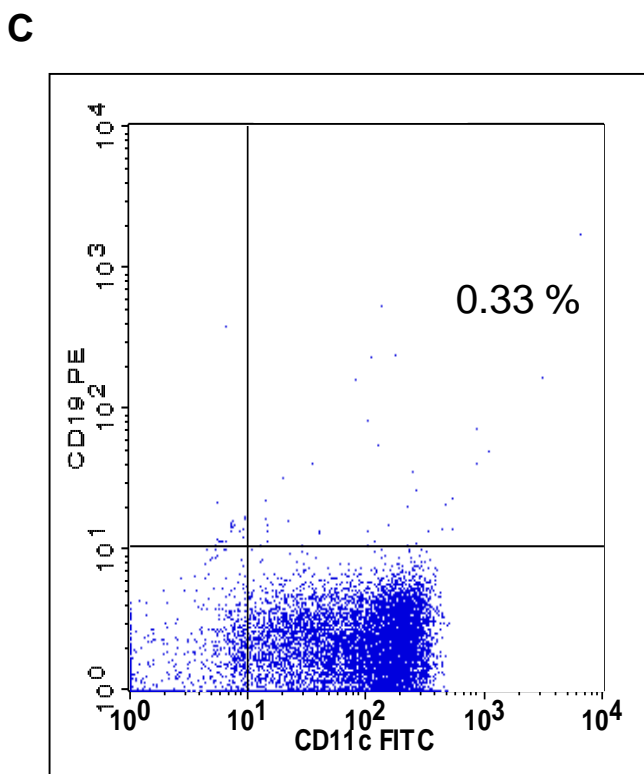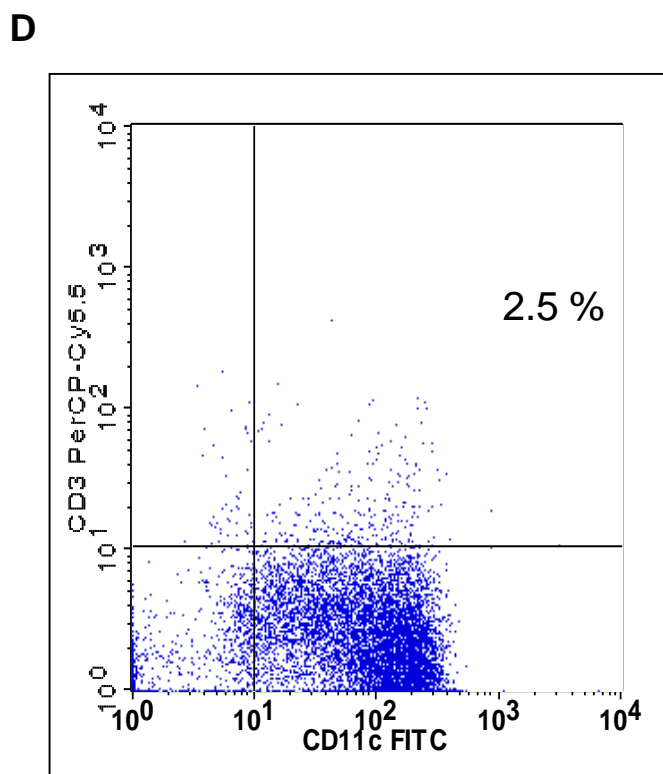

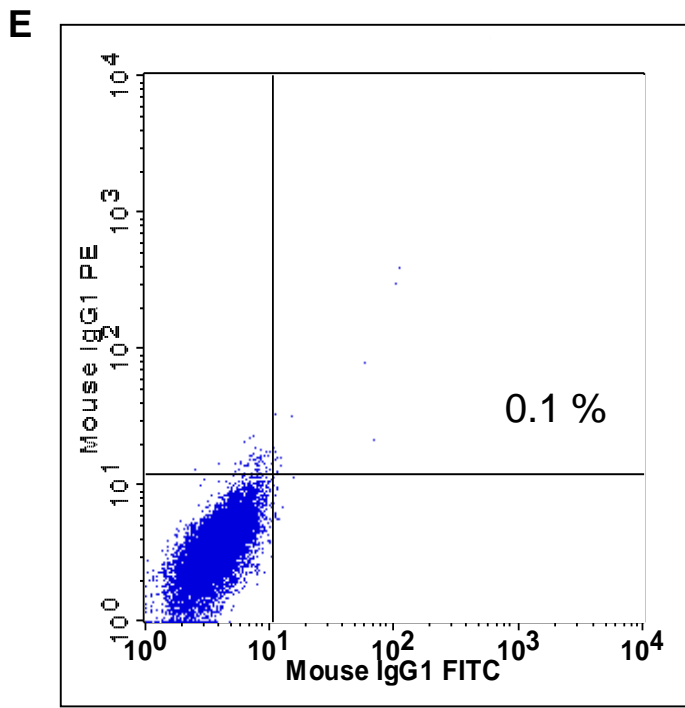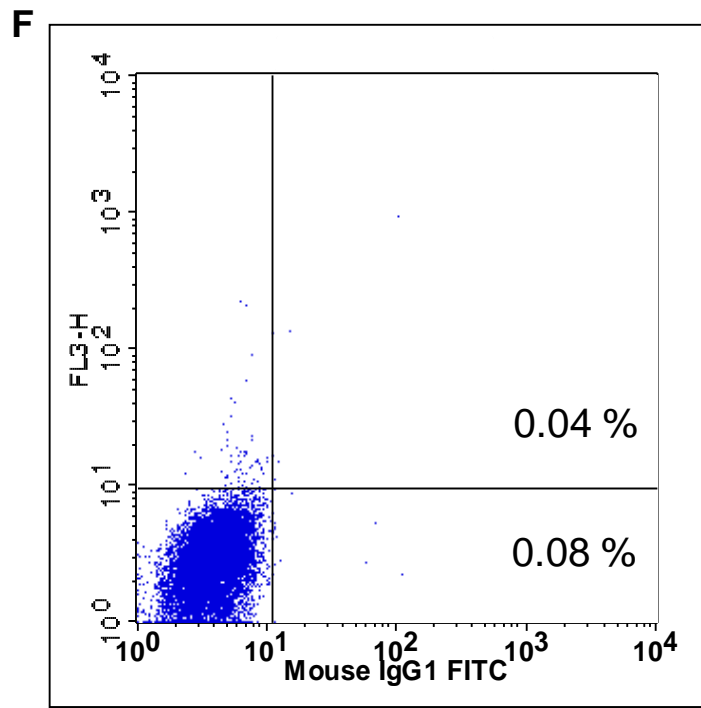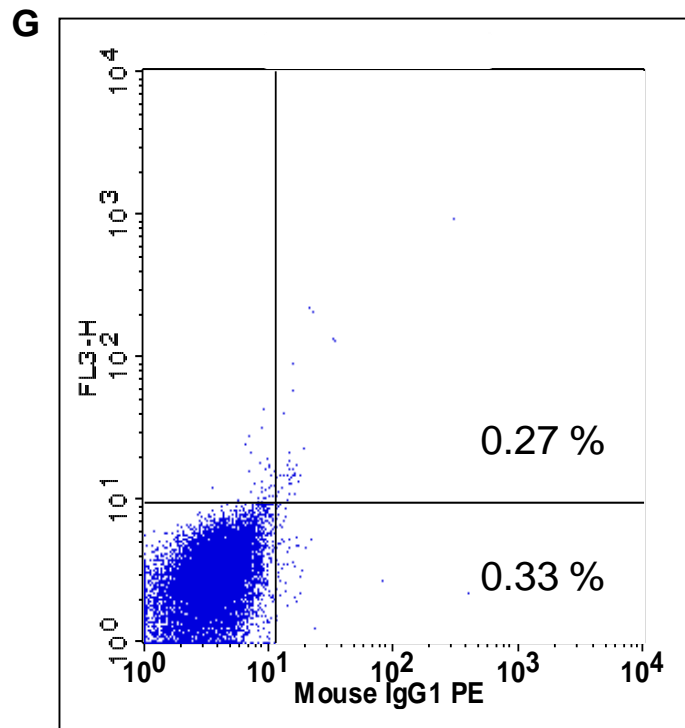

**Fig S1. The phenotype of human immature monocyte-derived DCs.**

The phenotype of dendritic cells (DCs) was determined by multi-color flow cytometry. DCs ( $8 \times 10^4$  per  $50 \mu\text{l}$ ) were stained with a fluorescein isothiocyanate (FITC)-labeled monoclonal antibody (mAb) to CD11c (Miltenyi Biotec, Germany) in combination with phycoerythrin (PE)-labeled mAb to HLA-DR (Miltenyi Biotec) (A) or PE-labeled mAb to CD14 (Beckman Coulter, USA) (B) or PE-labeled mAb to CD19 (Beckman Coulter) and PC5-labeled mAb to CD3 (Beckman Coulter) (C and D), after which the samples were resuspended in  $200 \mu\text{l}$  of phosphate-buffered saline (PBS, pH7.3) and analyzed with a 4-channel FACSCalibur flow cytometer using CellQuest software (Becton Dickinson, USA). The antibodies of the same isotypes and labels, but without antigenic targets in human cells (isotype control) were added into the control samples (E, F, G).
